# Supplementary material
Source: Springer Nature journal article supplement (https://www.springermedizin.de/resource/supplementary/12883_2009_267_MOESM1_ESM.pdf/9457202)
Supplement: MOESM1 [file 9457202]

Published until 7/03/2009  
Search in PubMed, EMBASE, CENTRAL

Potentially relevant documents identified and screened  
for retrieval n = 383; after removing duplicates n = 276  
PubMed (193), EMBASE (125), Cochrane Central  
Register of Controlled Trials (21), other Cochrane  
Library databases (23)

Potentially appropriate CCTs to be included in the  
systematic review  
n=16

CCT with usable information n = 14

- folic acid n = 10
- stimulants n = 1
- L-Acetylcarnitine n = 2
- Ampakine compound CX516 n = 1

Papers excluded due to abstract screening  
Non CCT: n = 260

Papers excluded due to full text screening  
n = 2

- No CCT: n = 1
- No information available on results n = 1
